# Supplementary material for: Electrospun nanofibers facilitate better alignment, differentiation, and long-term culture in an in vitro model of the neuromuscular junction (NMJ)
Source: Royal Society of Chemistry journal article supplement (doi:10.1039/c8bm00720a), 2018-01-01
Supplement: c8bm00720a1.pdf [file c8bm00720a1.pdf]

## Supplementary information

### **Electrospun Nanofibers Facilitate Better Alignment, Differentiation, and Long-Term Culture in an *In Vitro* Model of Neuromuscular Junction (NMJ)**

Baiwen Luo, Lingling Tian, Nuan Chen, Seeram Ramakrishna, Nitish Thakor, and In Hong Yang\*

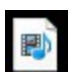

Video\_S1.mp4

Video S1. Recording of myotube contraction on a glass substrate without motor neuron co-culture.

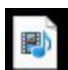

Video\_S2.mp4

Video S2. Recording of myotube contraction on a glass substrate after NMJ formation.

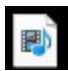

Video\_S3.mp4

Video S3. Recording of myotube contraction on R-PLA substrate after NMJ formation.

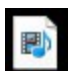

Video\_S4.mp4

Video S4. Recording of myotube contraction on A-PLA substrate after NMJ formation.
